# Supplementary material
Source: MDPI journal article supplement (https://www.mdpi.com/2304-6732/8/10/425)
Supplement: s1 [file s1]

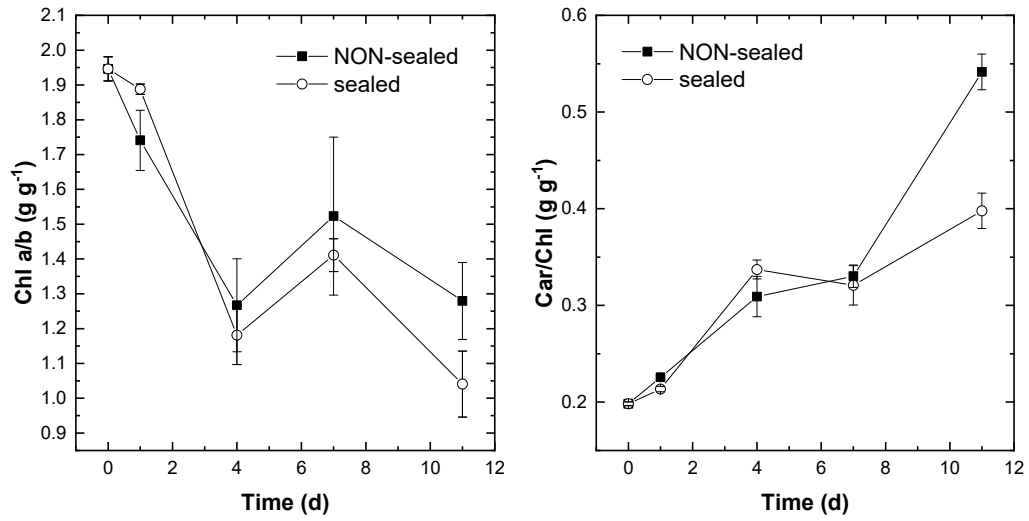

Figure S1. Changes in (A) [Chl] and (B) [Car]/[Chl] ratios during storage of the non-sealed (closed symbols) and sealed (open symbols) fresh-cut lettuce leaves.

Figure S2. Changes in leaf area exhibiting different values of CI<sub>678</sub> index (the color-coded images) indicative of [Chl] and (histograms immediately below the corresponding images) the corresponding distribution of the pixel values of the color-coded images in the stored non-sealed fresh-cut lettuce leave. For details, see Materials and Methods.

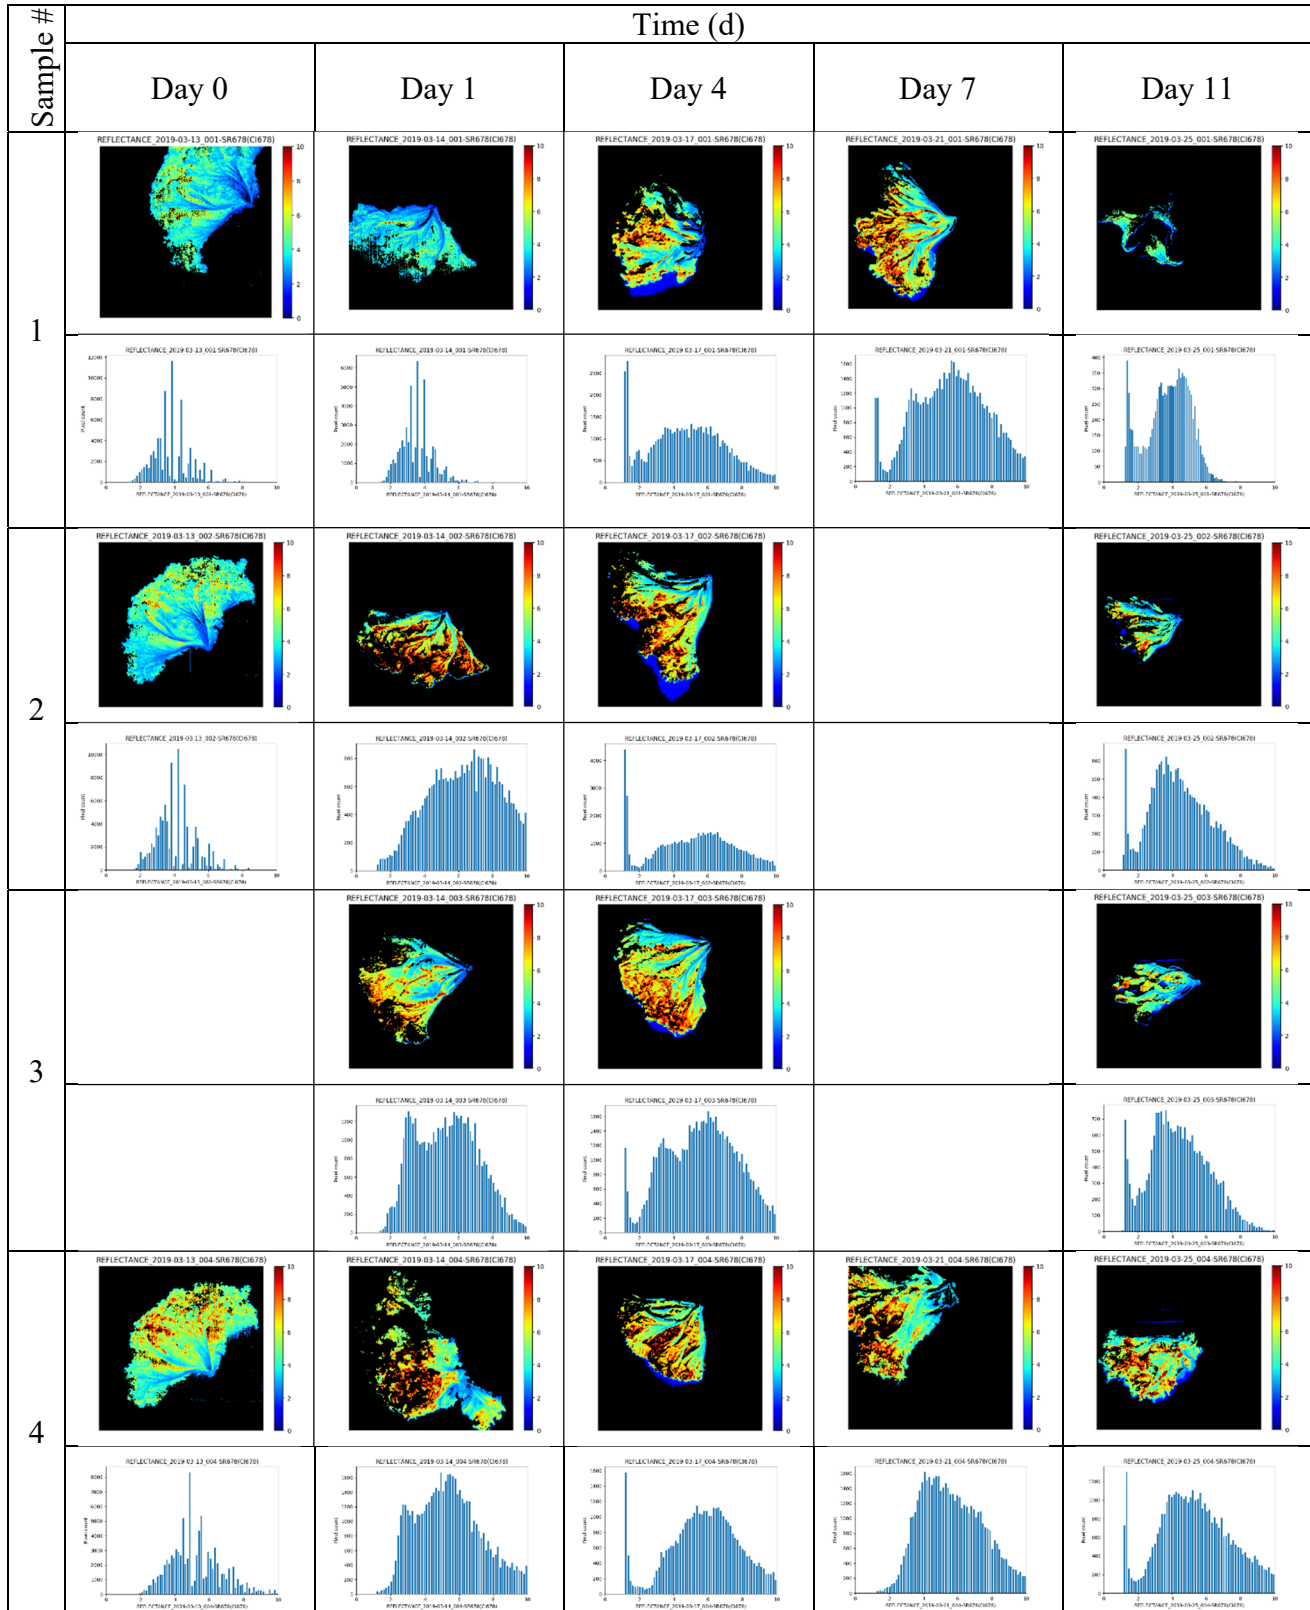

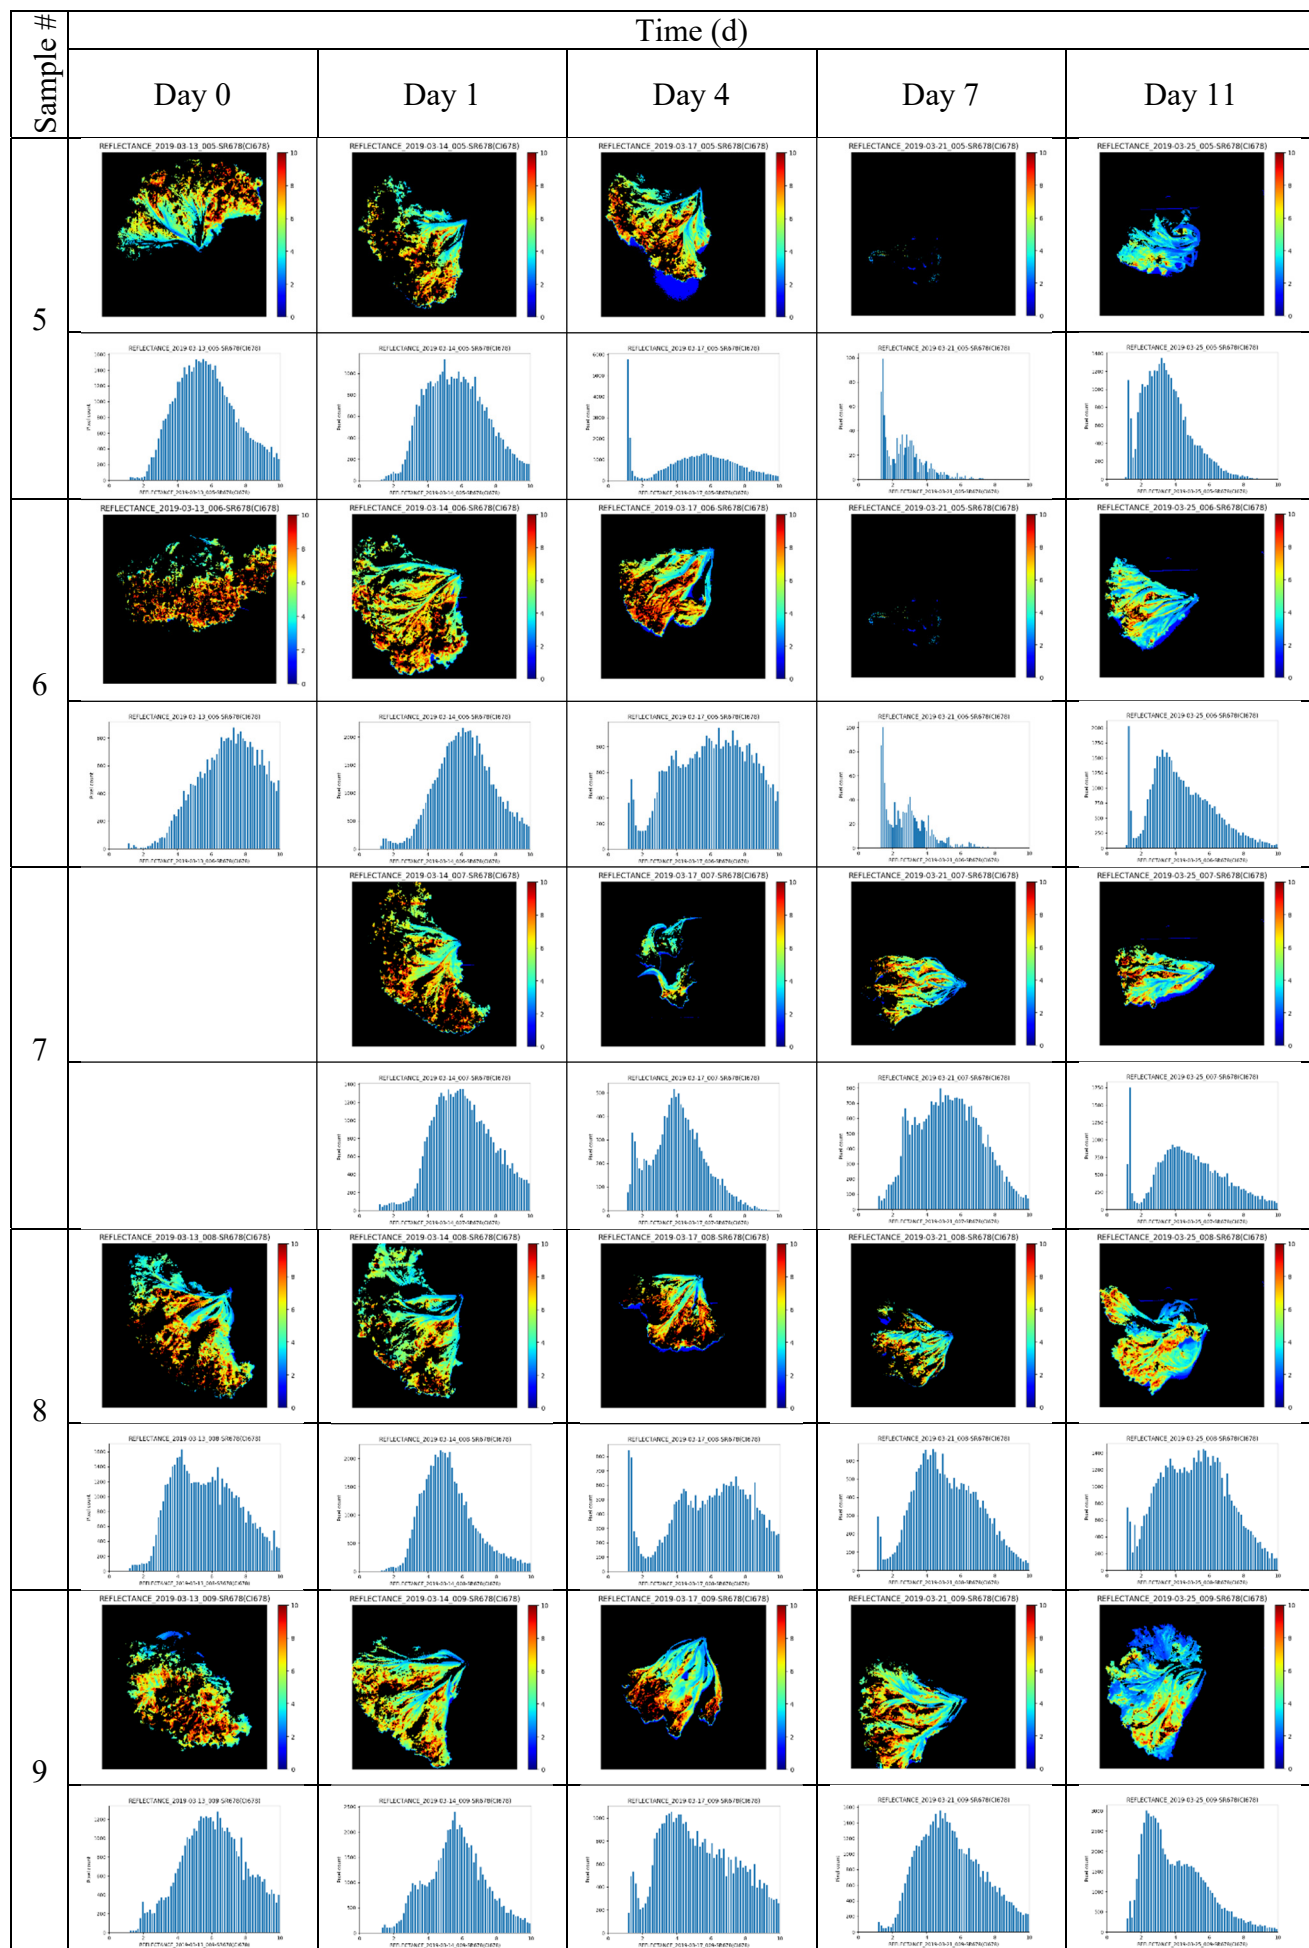

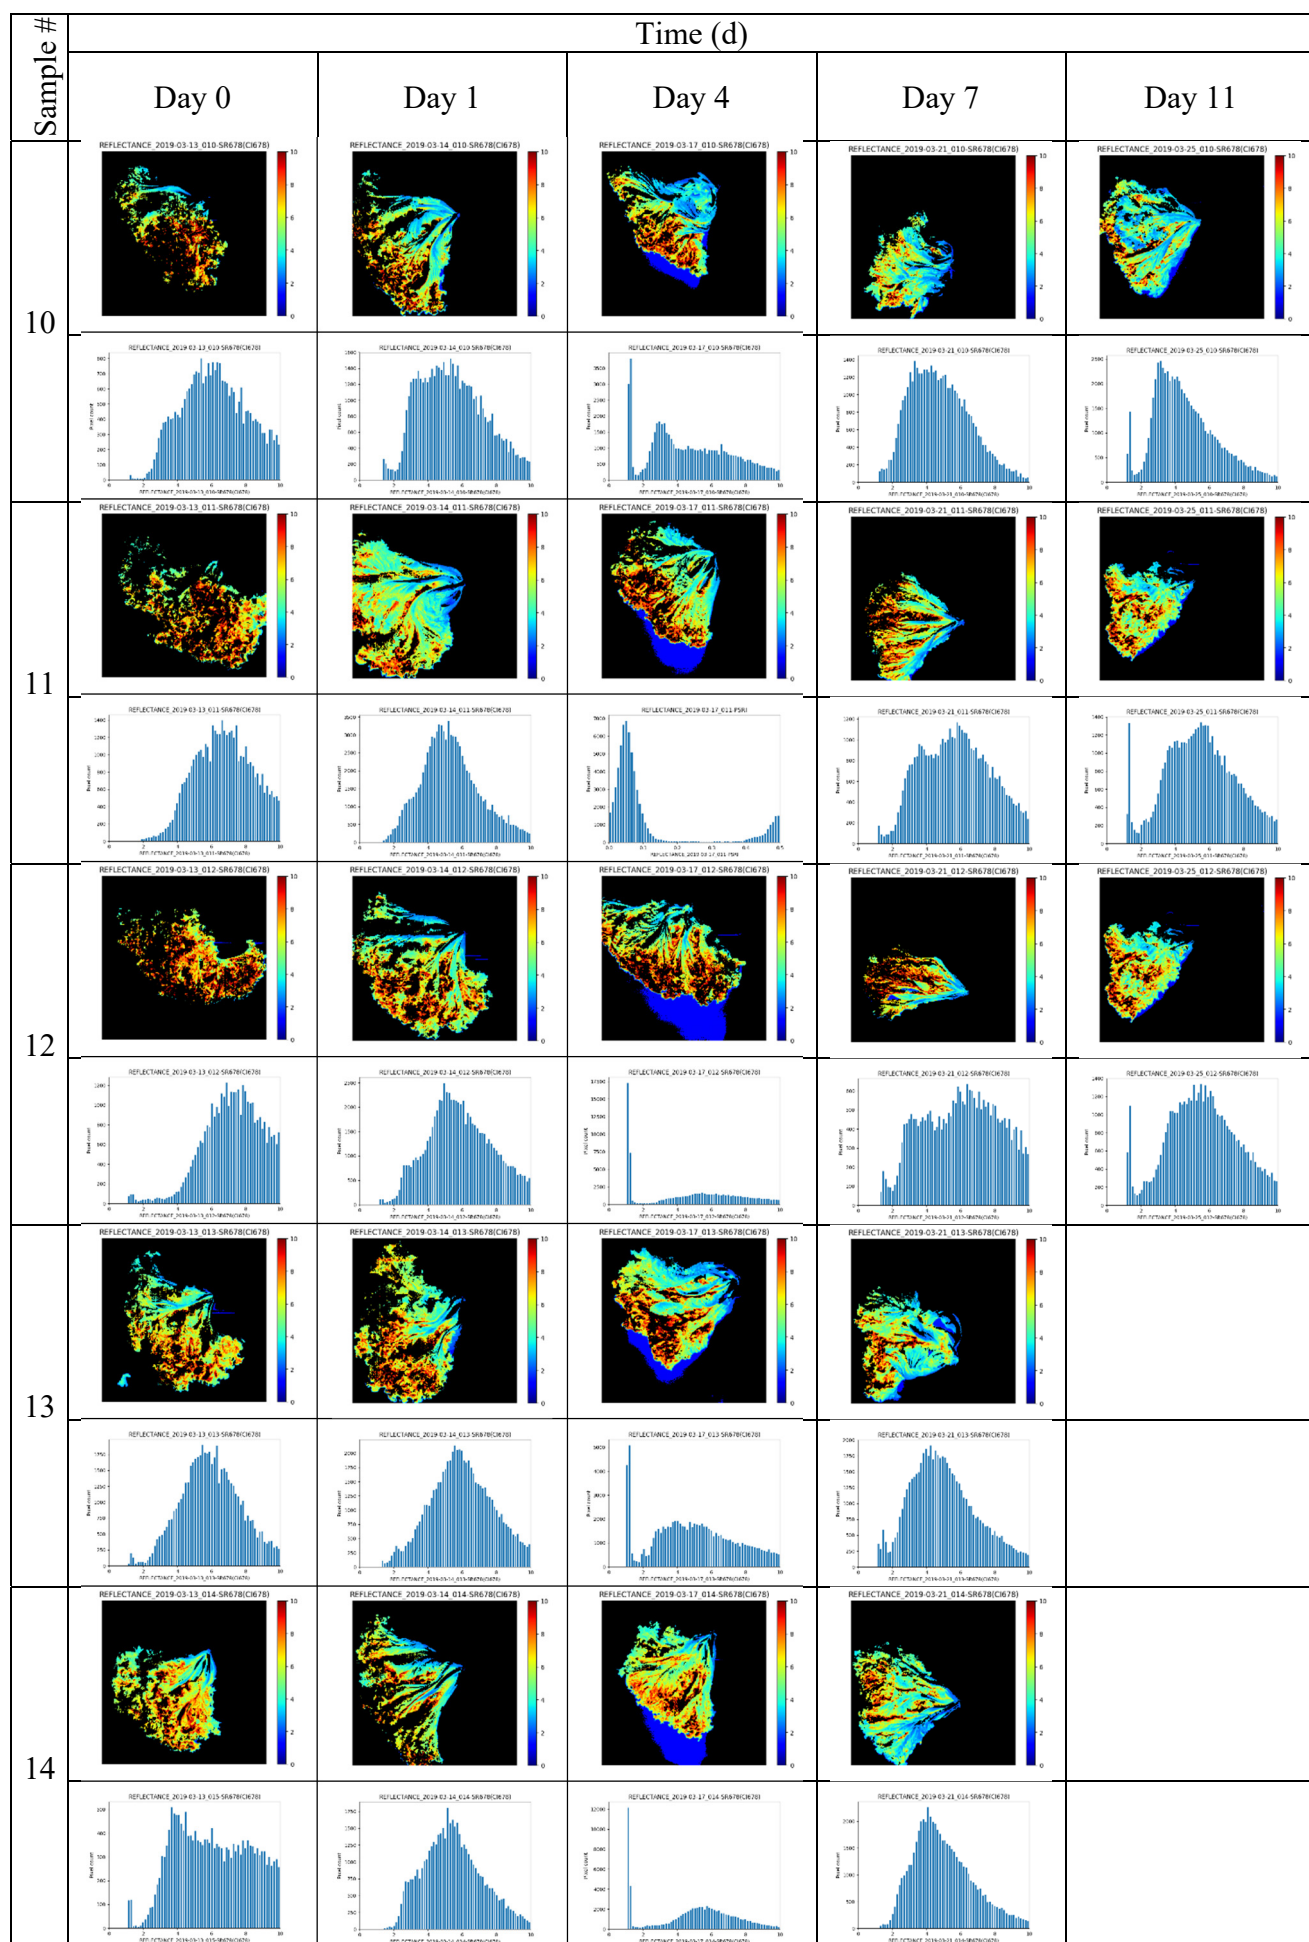

| Sample # | Time (d)                                   |                                            |                                            |                                            |        |
|----------|--------------------------------------------|--------------------------------------------|--------------------------------------------|--------------------------------------------|--------|
|          | Day 0                                      | Day 1                                      | Day 4                                      | Day 7                                      | Day 11 |
| 15       | REFLECTANCE_2019-03-13_015-SR678(C678)<br> | REFLECTANCE_2019-03-14_015-SR678(C678)<br> | REFLECTANCE_2019-03-17_015-SR678(C678)<br> | REFLECTANCE_2019-03-21_015-SR678(C678)<br> |        |
|          | REFLECTANCE_2019-03-13_015-SR678(C678)<br> | REFLECTANCE_2019-03-14_015-SR678(C678)<br> | REFLECTANCE_2019-03-17_015-SR678(C678)<br> | REFLECTANCE_2019-03-21_015-SR678(C678)<br> |        |
| 16       | REFLECTANCE_2019-03-13_016-SR678(C678)<br> | REFLECTANCE_2019-03-14_016-SR678(C678)<br> |                                            | REFLECTANCE_2019-03-21_016-SR678(C678)<br> |        |
|          | REFLECTANCE_2019-03-13_016-SR678(C678)<br> | REFLECTANCE_2019-03-14_016-SR678(C678)<br> |                                            | REFLECTANCE_2019-03-21_016-SR678(C678)<br> |        |
| 17       | REFLECTANCE_2019-03-13_017-SR678(C678)<br> | REFLECTANCE_2019-03-14_017-SR678(C678)<br> |                                            |                                            |        |
|          | REFLECTANCE_2019-03-13_017-SR678(C678)<br> | REFLECTANCE_2019-03-14_017-SR678(C678)<br> |                                            |                                            |        |
| 18       | REFLECTANCE_2019-03-13_018-SR678(C678)<br> | REFLECTANCE_2019-03-14_018-SR678(C678)<br> |                                            |                                            |        |
|          | REFLECTANCE_2019-03-13_018-SR678(C678)<br> | REFLECTANCE_2019-03-14_018-SR678(C678)<br> |                                            |                                            |        |

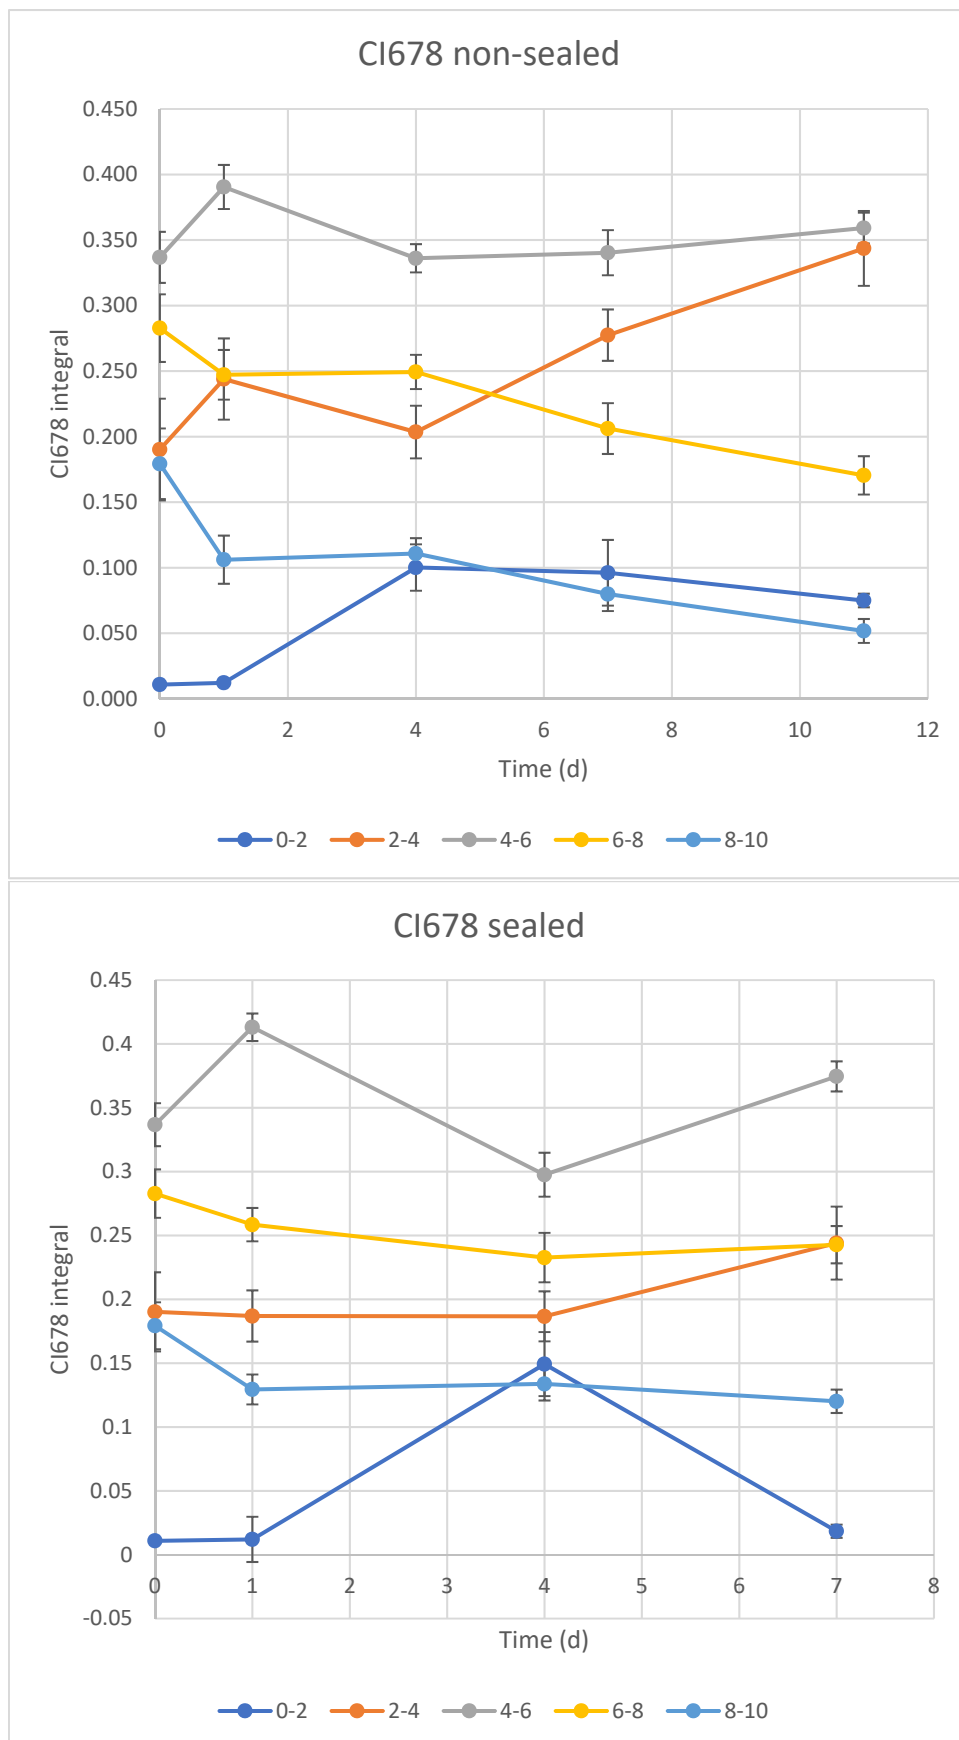

Figure S3. Time-course of changes in the relative area of (top graph) non-sealed and (bottom graph) exhibiting the values of the CI<sub>678</sub> index in the ranges indicated in the graph annotation.

Figure S4. Changes in leaf area exhibiting different values of PSRI index (the color-coded images) indicative of [Chl] and (histograms immediately below the corresponding images) the corresponding distribution of the pixel values of the color-coded images in the stored non-sealed fresh-cut lettuce leave. For details, see Materials and Methods.

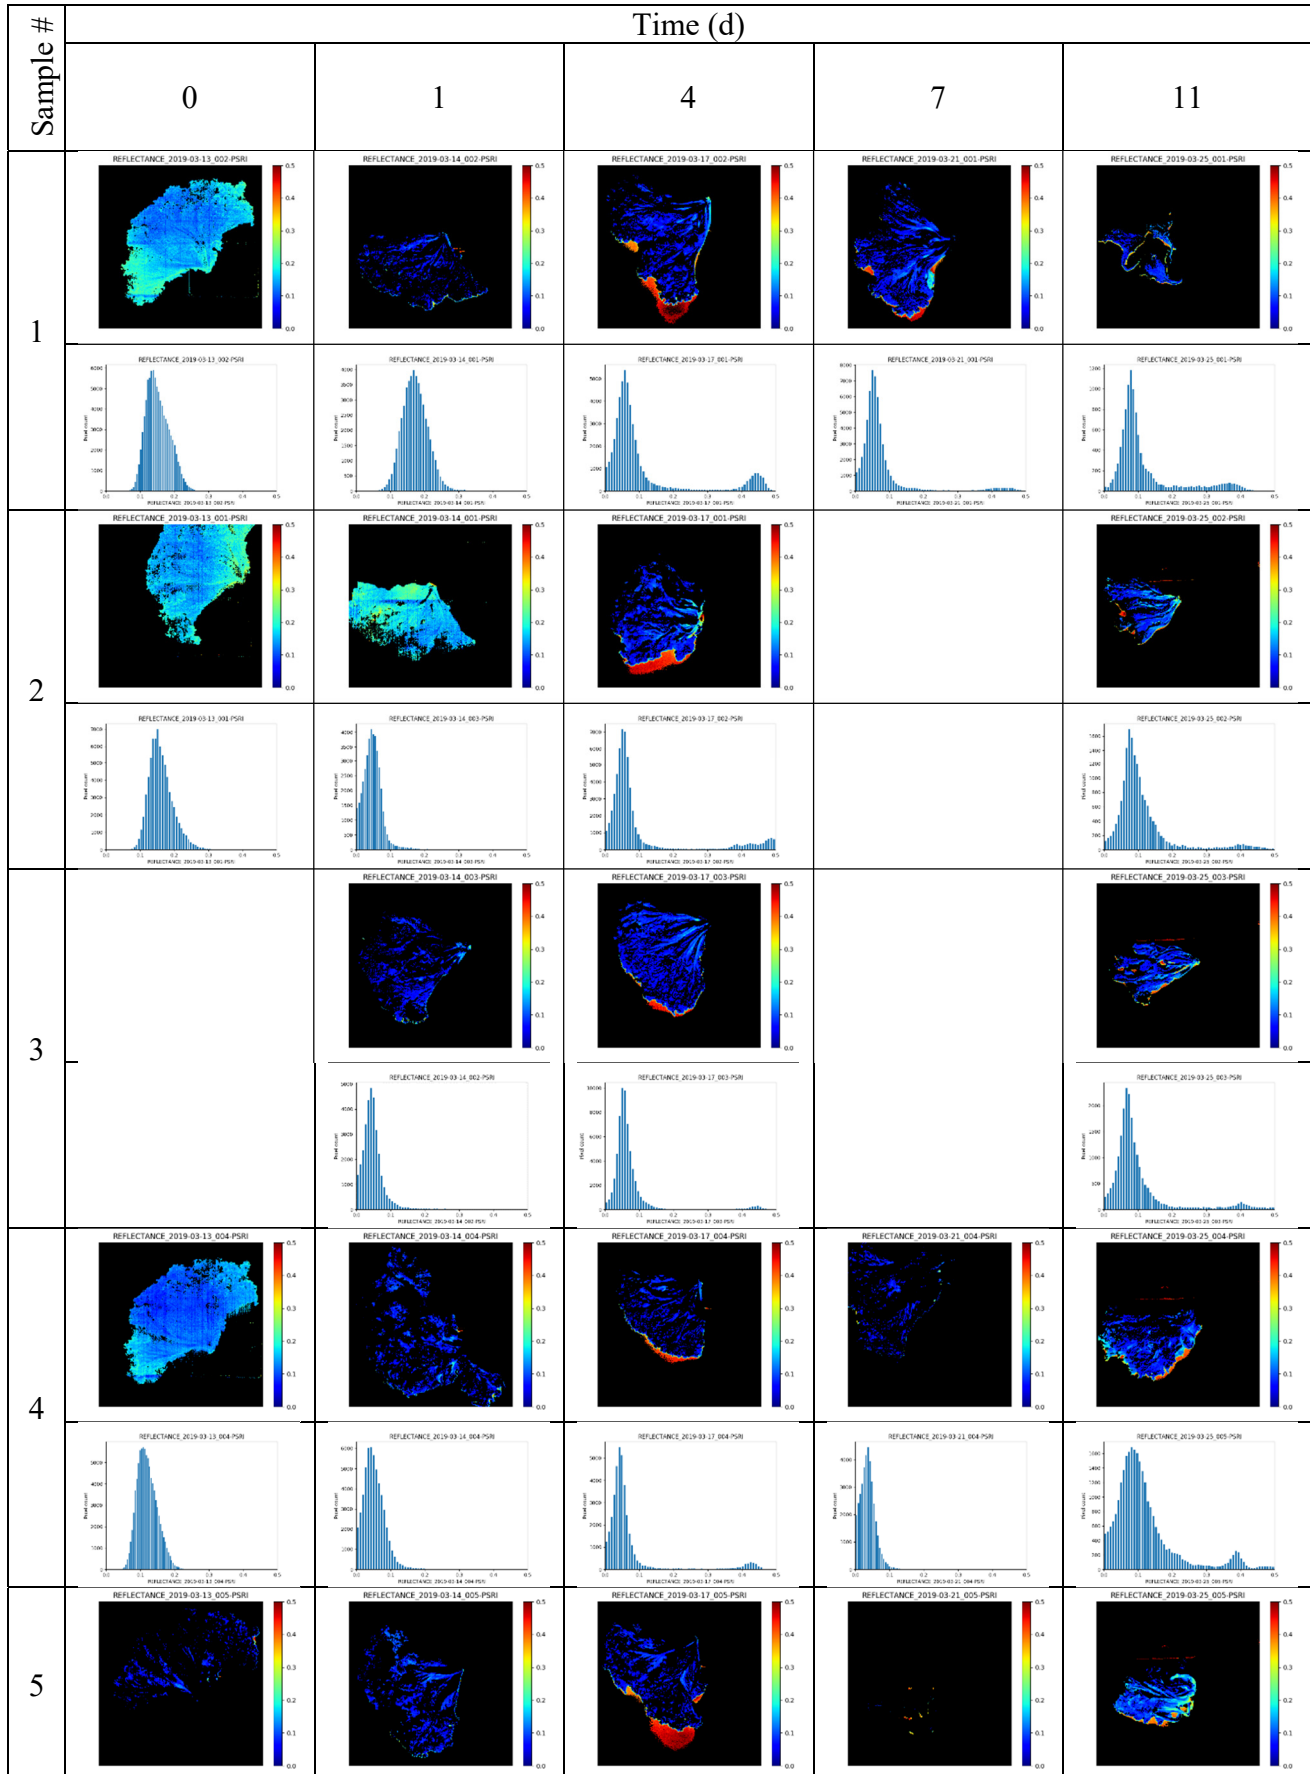

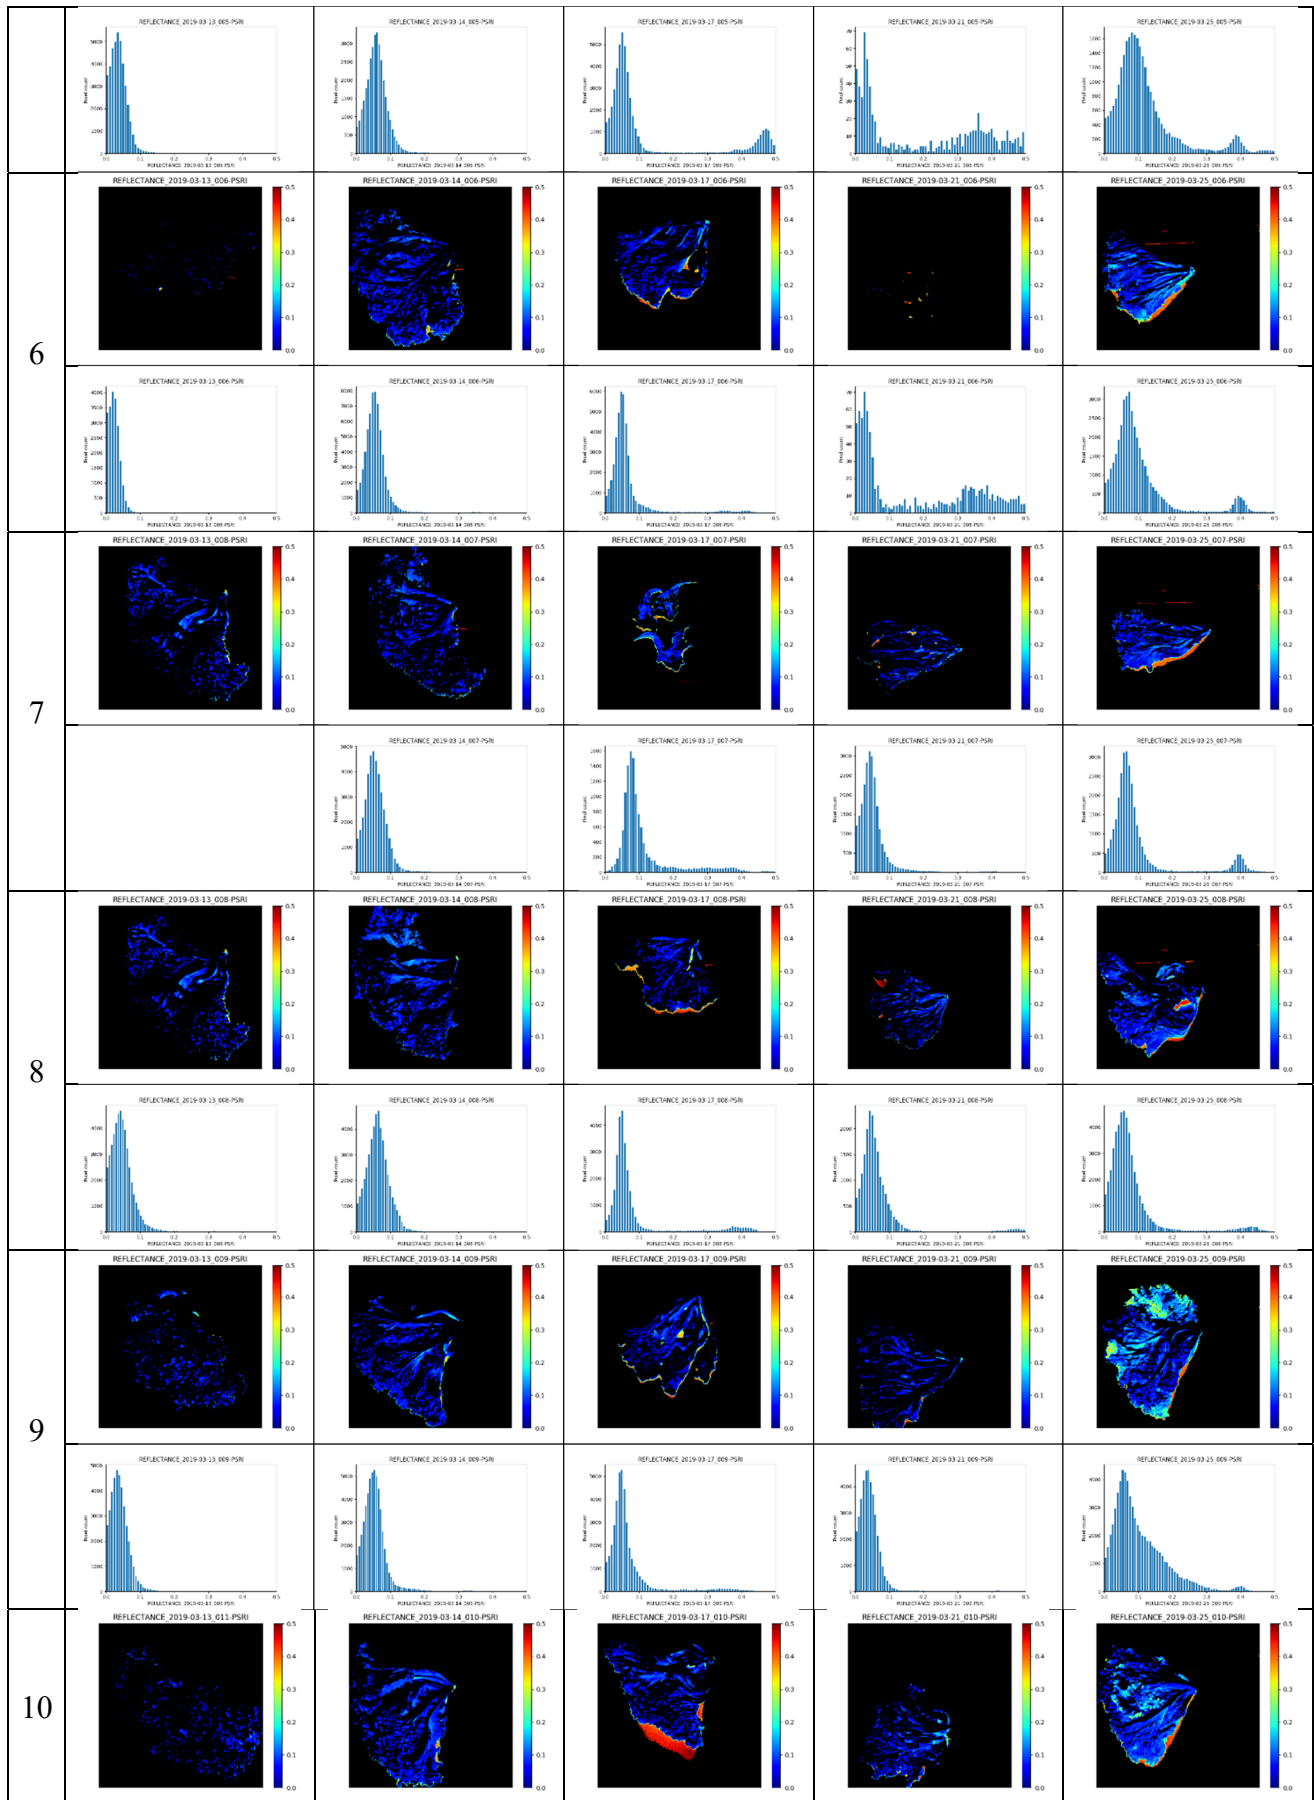

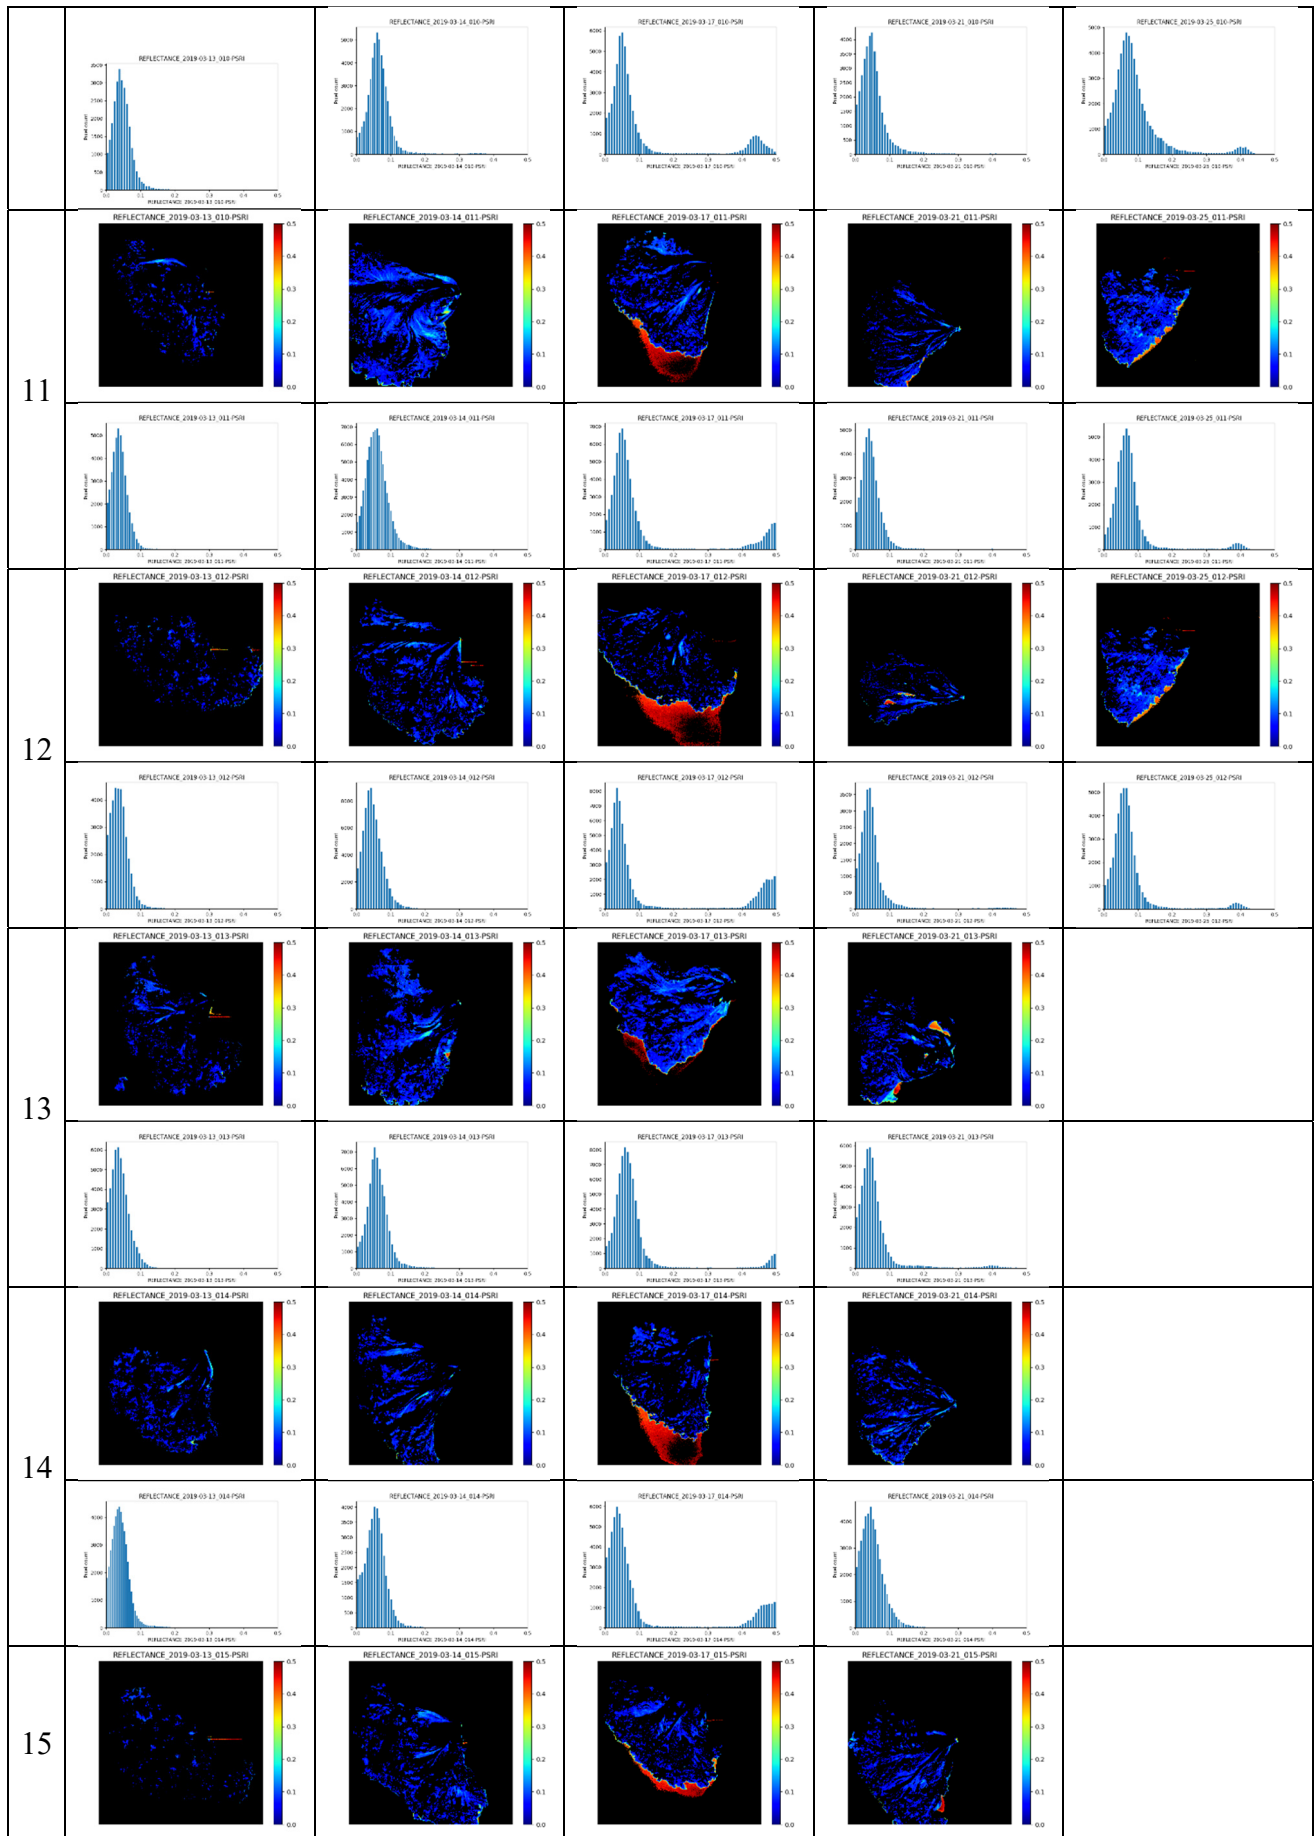

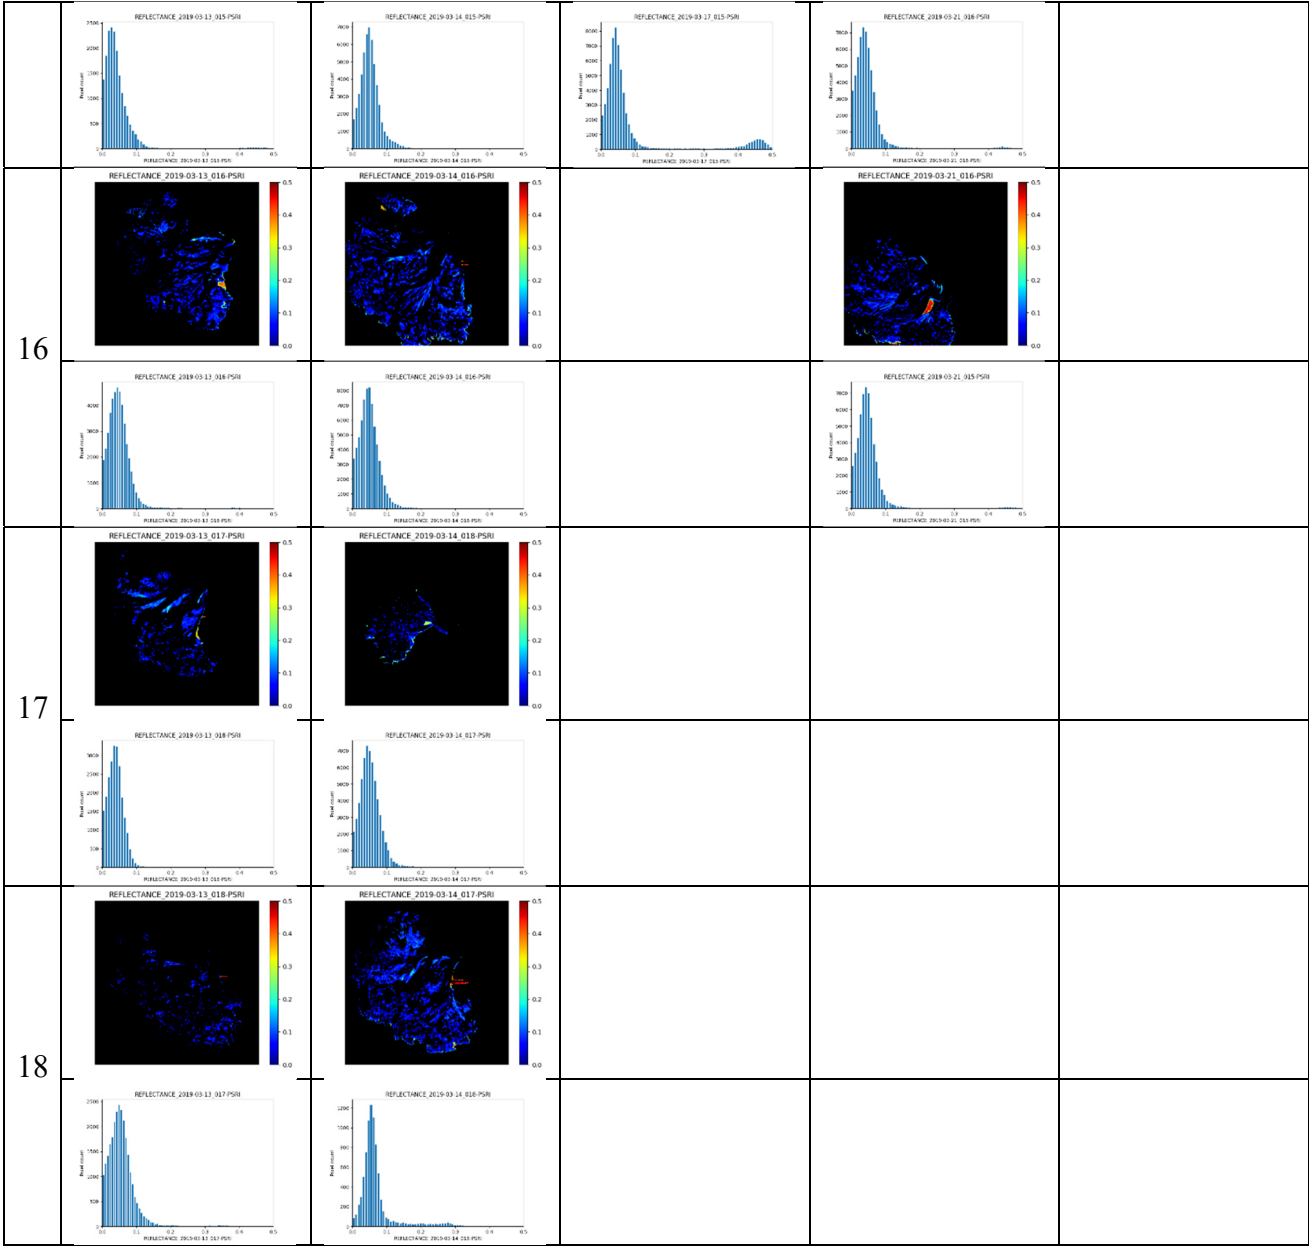

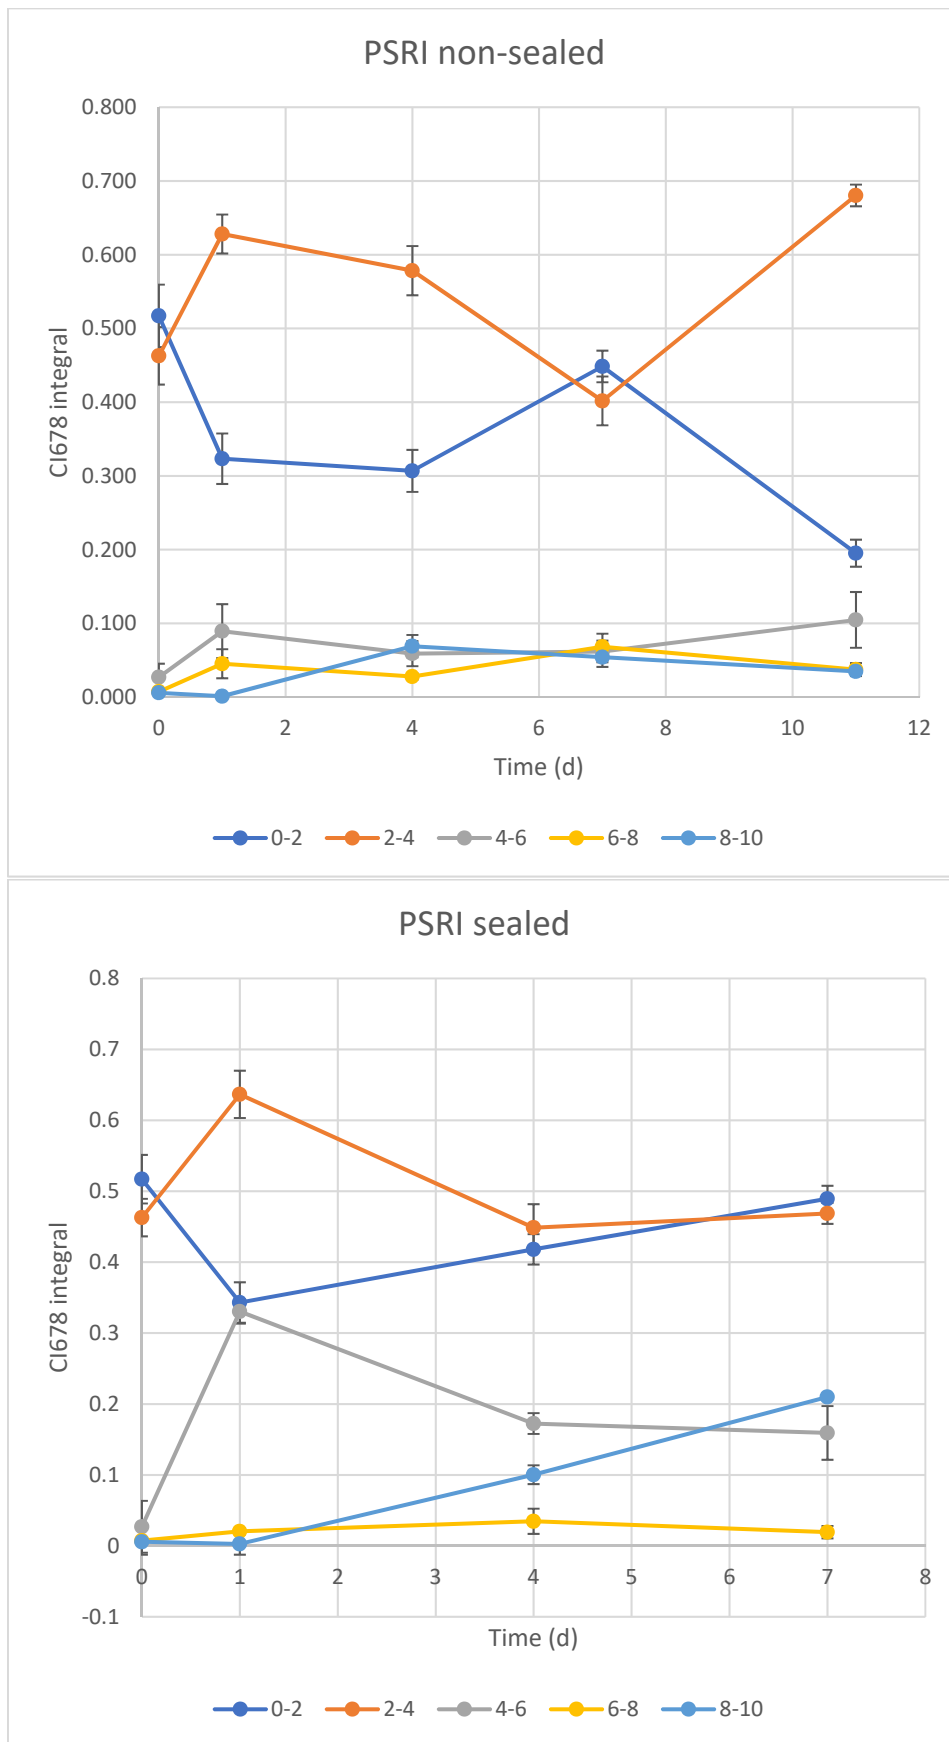

Figure S5. Time-course of changes in the relative area of (top graph) non-sealed and (bottom graph) exhibiting the values of the PSRI index in the ranges indicated in the graph annotation.
